# Supplementary material for: Preparation of Gold Nanoparticles via Anodic Stripping of Copper Underpotential Deposition in Bulk Gold Electrodeposition for High-Performance Electrochemical Sensing of Bisphenol A
Source: MDPI journal article supplement (doi:10.3390/molecules28248036), 2023-12-11
Supplement: s1 [file s1]

***Supporting Information For***

**Preparation of Au nanoparticles *via* anodic stripping of underpotential deposition-Cu in bulk electrodeposition-Au for high-performance electrochemical sensing of bisphenol A**

Zhao Huang <sup>1</sup>, Zihan Chen <sup>1</sup>, Dexuan Yan <sup>1</sup>, Shuo Jiang <sup>1</sup>, Libo Nie <sup>1</sup>, Xinman Tu <sup>2</sup>, Xueen Jia <sup>1,3</sup>, Thomas Wågberg <sup>3</sup> and Long Chao <sup>1,\*</sup>

<sup>1</sup> Hunan Key Laboratory of Biomedical Nanomaterials and Devices, College of Life Sciences and Chemistry, Hunan University of Technology, Zhuzhou 412007, China

<sup>2</sup> Key Laboratory of Jiangxi Province for Persistent Pollutants Control and Resources Recycle, Nanchang Hangkong University, Nanchang 330063, China

<sup>3</sup> Department of Physics, Umeå University, SE-901 87, Umeå, Sweden

\*Correspondence: E-mail: chaolong4617@163.com

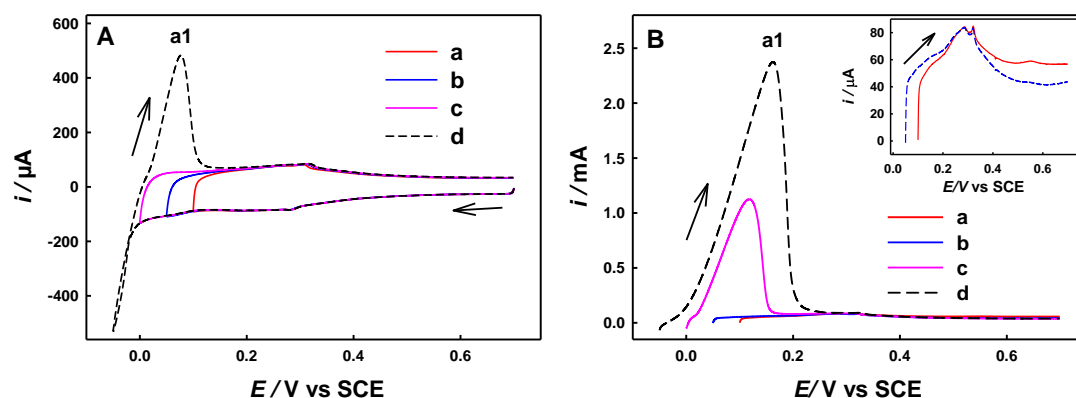

**Figure S1.** (A) CV curves with different negative potential limits (a: 0.1 V, b: 0.05 V, c: 0 V and d: -0.05 V) and (B) LSASV curves on Au electrode after 20 s preconcentration at 0.1 V (a), 0.05 V (b), 0 V (c) and -0.05 V (d). Inset: magnification of LSASV curves a and b for the graph B. Solution: 10 mM CuSO<sub>4</sub> + 0.2 M aqueous HClO<sub>4</sub>. Scan rate: 50 mV s<sup>-1</sup>. The arrow indicates the direction of the scanning here.

The CV experiments show that the oxidation peak of Cu(0) to Cu<sup>2+</sup> (P<sub>a1</sub>) appears for a negative potential limit at -0.05 V (d). However, at negative potential limit of 0.1 V (a), 0.05 V (b) and 0 V (c), the oxidation peak of Cu(0) to Cu<sup>2+</sup> (P<sub>a1</sub>) disappears. The LSASV curves after preconcentration for 30 s show that peaks P<sub>a1</sub> appear when the preconcentration potential is at -0.05 V (d) and 0 V (c), but peak P<sub>a1</sub> disappear after preconcentration at 0.05 V (b) and 0.1 V (a). The small oxidation peaks indicate the anodic stripping of UPD-Cu in the inset. The oxidation peak of Cu(0) to Cu<sup>2+</sup> (P<sub>a1</sub>) disappears by CV but appears by LSASV at negative potential limit of 0 V here, which could be due to a short time for BD of Cu by CV. In general, both CV and LSASV experiments indicate that here only UPD of Cu but no BD of Cu occur at 0.05 V and 0.1 V. In order to completely avoid the simultaneous BD of Cu on Au, a deposition potential of 0.1 V was selected here for preparation of Au<sub>Cu-UPD</sub>/MWCNTs/GCE. In addition, the anodic stripping of UPD-Cu can completely finished at 0.6 V as shown in the inset of graph B.

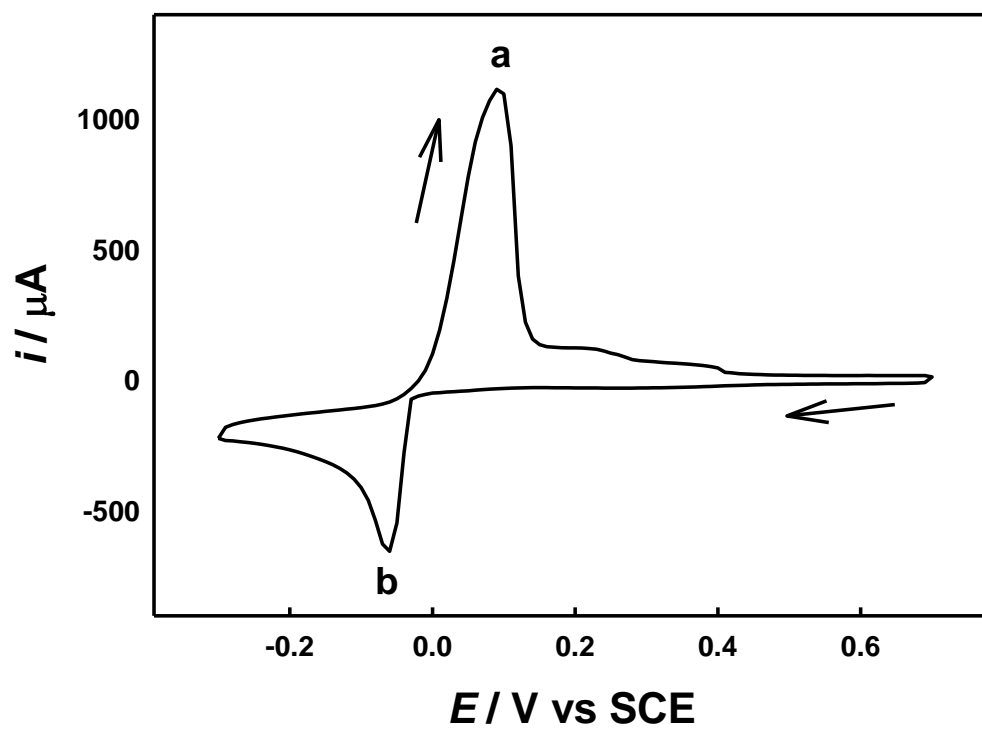

**Figure S2.** CV curves on the  $\text{Au}_{\text{Con}}/\text{MWCNTs}/\text{GCE}$  in 0.2 M aqueous  $\text{HClO}_4$  containing 10 mM  $\text{CuSO}_4$ . Scan rate:  $50 \text{ mV s}^{-1}$

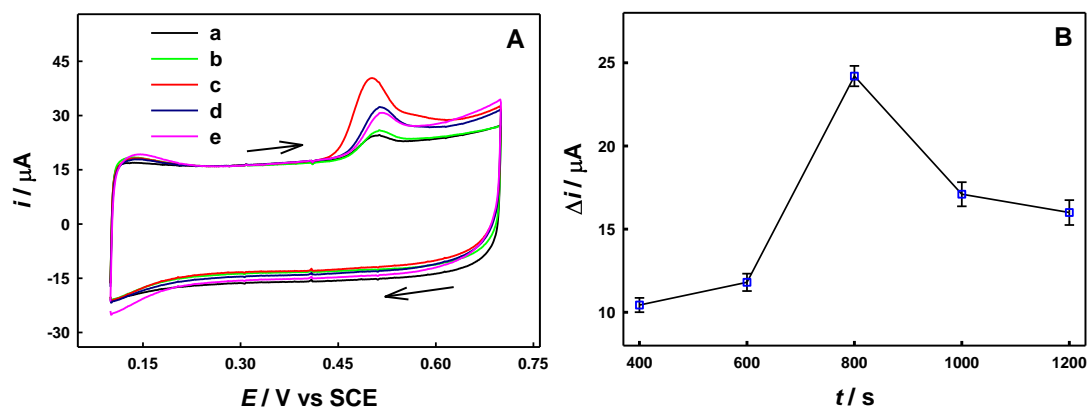

**Figure S3.** CV curves of the  $\text{Au}_{\text{Cu-UPD}}/\text{MWCNTs}/\text{GCEs}$  prepared by varying Cu-underpotential/Au-bulk coelectrodeposition time in 0.1 M PBS (pH 7.5) containing 10  $\mu\text{M}$  BPA (A), and relationship between the oxidation peak current of BPA and coelectrodeposition time. Scan rate: 50  $\text{mV s}^{-1}$ .

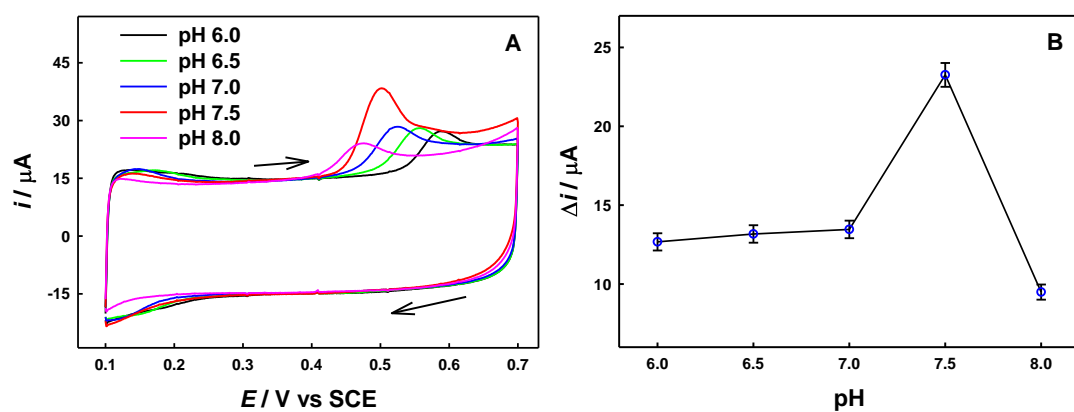

**Figure S4.** CV curves of the Au<sub>Cu</sub>-UPD/MWCNTs/GCEs in 0.1 M PBS with different pH values

(6.0, 6.5, 7.0, 7.5 and 8.0) containing 10 μM BPA (A), and a plots of peak current against pH

(B). Scan rate: 50 mV s<sup>-1</sup>.

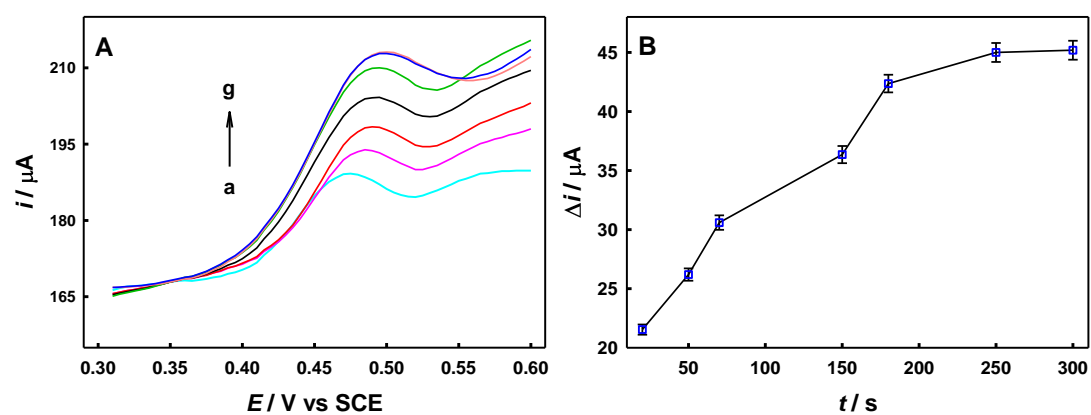

**Figure S5.** DPV curves of the Au<sub>Cu</sub>-UPD/MWCNTs/GCE in 0.1 M PBS (pH 7.5) containing 10  $\mu$ M BPA at different preconcentration time (A) and a plots of peak current of the corresponding DPV curves against different preconcentration times (B). Preconcentration potential: 0.3 V.

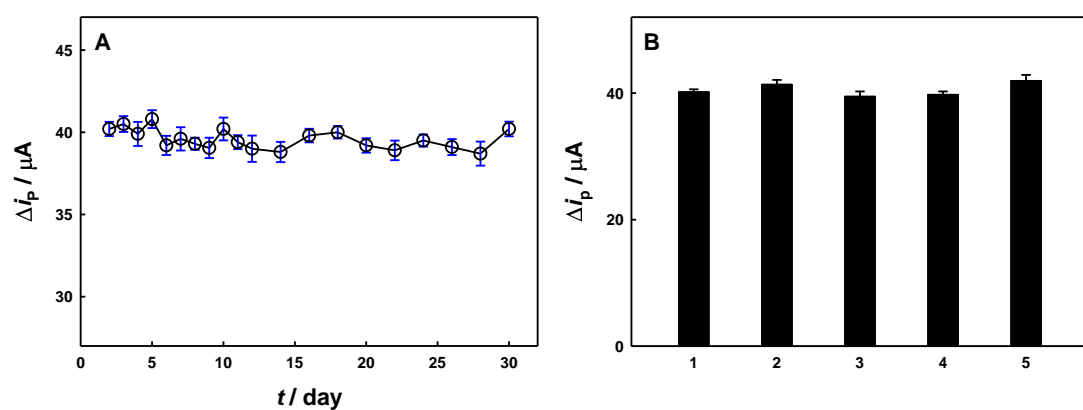

**Figure S6.** Stability of Au<sub>Cu</sub>-UPD/MWCNTs/GCE with repeated detection of BPA for 30 days

(A). Reproducibility on five Au<sub>Cu</sub>-UPD/MWCNTs/GCE (No.1-5) with detection of BPA (B). All data were obtained from every DPV response in 0.1 M PBS (pH 7.5) containing 5  $\mu M$  BPA and average values calculated from three determinations. 300 s preconcentration and at preconcentration potential of 0.3 V.
